# Supplementary material for: Course of serological tests in treated subjects with chronic Trypanosoma cruzi infection: A systematic review and meta-analysis of individual participant data
Source: PubMed Central journal article supplement — Int J Infect Dis. 2018 Aug;73:93–101. doi: 10.1016/j.ijid.2018.05.019 (PMC6069672; doi:10.1016/j.ijid.2018.05.019), 2018-08
Supplement: mmc1.pdf [file mmc1.pdf]

## Supplementary Material. Annex A

**Table S1.** Literature search strategy in MEDLINE used for this meta-analysis.

| Search              | Query                                                                | Items found           |
|---------------------|----------------------------------------------------------------------|-----------------------|
| <a href="#">#16</a> | Search (#6 AND #14) Filters: <b>Publication date from 2013/07/01</b> | <a href="#">194</a>   |
| <a href="#">#15</a> | Search (#6 AND #14)                                                  | <a href="#">1122</a>  |
| <a href="#">#14</a> | Search (#7 OR #8 OR #9 OR #10 OR #11 OR #12 OR #13)                  | <a href="#">1273</a>  |
| <a href="#">#13</a> | Search <b>Lampit</b> [tiab]                                          | <a href="#">25</a>    |
| <a href="#">#12</a> | Search <b>nifurtimox</b> [tiab]                                      | <a href="#">556</a>   |
| <a href="#">#11</a> | Search <b>Nifurtimox</b> [Mesh]                                      | <a href="#">378</a>   |
| <a href="#">#10</a> | Search <b>Radanil</b> [tiab]                                         | <a href="#">3</a>     |
| <a href="#">#9</a>  | Search <b>benzonidazol*</b> [tiab]                                   | <a href="#">39</a>    |
| <a href="#">#8</a>  | Search <b>benznidazol*</b> [tiab]                                    | <a href="#">785</a>   |
| <a href="#">#7</a>  | Search <b>Benzonidazole</b> [Supplementary Concept]                  | <a href="#">561</a>   |
| <a href="#">#6</a>  | Search (#1 OR #2 OR #3 OR #4 OR #5)                                  | <a href="#">35077</a> |
| <a href="#">#5</a>  | Search <b>T.Cruzi</b> [tiab]                                         | <a href="#">6737</a>  |
| <a href="#">#4</a>  | Search <b>Cruzi</b> [tiab]                                           | <a href="#">12376</a> |
| <a href="#">#3</a>  | Search <b>Trypanosom*</b> [tiab]                                     | <a href="#">29520</a> |
| <a href="#">#2</a>  | Search <b>Chagas</b> [tiab]                                          | <a href="#">9768</a>  |
| <a href="#">#1</a>  | Search <b>Chagas Disease</b> [Mesh]                                  | <a href="#">10561</a> |

**Table S2.** Studies for which individual participant data could be available but were not obtained (12 studies, 1899 treated subjects with chronic *Trypanosoma cruzi* infection).

| Source                                    | Study ID <sup>a</sup>     | Duration of follow-up (months) | Study population  | Anti-trypanosomal drug    | Number of treated subjects according to test |     |                                |     |     |        |    |        |                        |     | Total number of subjects <sup>b</sup> |
|-------------------------------------------|---------------------------|--------------------------------|-------------------|---------------------------|----------------------------------------------|-----|--------------------------------|-----|-----|--------|----|--------|------------------------|-----|---------------------------------------|
|                                           |                           |                                |                   |                           | Parasitological/molecular tests              |     | Conventional serological tests |     |     | Others |    |        |                        |     |                                       |
|                                           |                           |                                |                   |                           | XD                                           | PCR | ELISA                          | IIF | IHA | CoML   | CF | DA-2MD | Non-conventional ELISA |     |                                       |
| Argentina                                 | Viotti et al. 2011        | 36 (median)                    | Adults            | Benznidazole              | -                                            | -   | 53                             | 53  | 53  | -      | -  | -      | 32                     | 53  |                                       |
|                                           | Viotti et al. 2009        | 124.8 (mean)                   | Adults            | Benznidazole              | -                                            | -   | 760                            | 760 | 760 | -      | -  | -      | -                      | 760 |                                       |
|                                           | Viotti et al. 2006        | 117.6 (median)                 | Adults            | Benznidazole              | -                                            | -   | 158                            | 158 | 158 | -      | -  | -      | -                      | 158 |                                       |
|                                           | Gallerano and Sosa 2000   | 64 (mean)                      | Adults & children | Benznidazole & Nifurtimox | 226                                          | -   | -                              | 226 | 226 | -      | -  | -      | -                      | 226 |                                       |
|                                           | Fabbro et al. 2000        | 180 (mean)                     | Adults            | Benznidazole & Nifurtimox | 38                                           | -   | 38                             | 38  | 38  | -      | -  | -      | -                      | 55  |                                       |
|                                           | Fabbro et al. 2007        | 247 (mean)                     |                   |                           | 41                                           | -   | -                              | 54  | 54  | -      | -  | 54     | -                      |     |                                       |
|                                           | Fabbro et al. 2010        | 276 (mean)                     |                   |                           | -                                            | -   | -                              | 55  | 55  | -      | -  | 55     | 29                     |     |                                       |
| Fabbro et al. 2013                        | -                         |                                |                   |                           | -                                            | -   | 55                             | 55  | -   | -      | 55 | 29     |                        |     |                                       |
| Viotti et al. 1994                        | 96 (mean)                 | Adults                         | Benznidazole      | 24                        | -                                            | -   | 110                            | 110 | -   | 110    | -  | -      | 110                    |     |                                       |
| <b>Total number of subjects-Argentina</b> |                           |                                |                   |                           |                                              |     |                                |     |     |        |    |        | <b>1362</b>            |     |                                       |
| Brazil                                    | Andrade et al. 2013       | 48                             | Adults            | Benznidazole              | -                                            | -   | 13                             | -   | -   | -      | -  | -      | -                      | 13  |                                       |
|                                           | Diniz Marques et al. 2003 | 24                             | Children          | Benznidazole              | -                                            | -   | 46                             | 46  | 46  | -      | -  | -      | -                      | 46  |                                       |
|                                           | Coura et al. 1997         | 12                             | Adults            | Benznidazole & Nifurtimox | 42                                           | -   | -                              | 42  | -   | -      | 42 | -      | -                      | 42  |                                       |
| <b>Total number of subjects-Brazil</b>    |                           |                                |                   |                           |                                              |     |                                |     |     |        |    |        | <b>101</b>             |     |                                       |
| Colombia                                  | Bianchi et al. 2015       | 30                             | Children          | Nifurtimox                | -                                            | 43  | 43                             | -   | 43  | -      | -  | -      | -                      | 43  |                                       |
|                                           | Gulh et al. 2004          | 5                              | Children          | Benznidazole              | -                                            | -   | 36                             | -   | 36  | -      | -  | -      | -                      | 36  |                                       |
| <b>Total number of subjects-Colombia</b>  |                           |                                |                   |                           |                                              |     |                                |     |     |        |    |        | <b>79</b>              |     |                                       |
| Spain                                     | Pérez-Ayala et al. 2011   | 12 (median)                    | Adults            | Benznidazole              | -                                            | 357 | 357                            | -   | 357 | -      | -  | -      | -                      | 357 |                                       |
| <b>Total number of subjects-Spain</b>     |                           |                                |                   |                           |                                              |     |                                |     |     |        |    |        | <b>357</b>             |     |                                       |
| <b>Grand total</b>                        |                           |                                |                   |                           |                                              |     |                                |     |     |        |    |        | <b>1899</b>            |     |                                       |

<sup>a</sup> References of all studies not providing individual participant data are available in Annex B of the Supplementary Material. <sup>b</sup> The estimation of total number of subjects was based on published data.

CF, complement fixation; CoML, complement-mediated lysis test; DA-2MD, direct agglutination with 2-mercaptoethanol; ELISA, enzyme-linked immunosorbent assay; IIF, indirect immunofluorescence assay; IHA, indirect hemagglutination assay; PCR, polymerase chain reaction; XD, xenodiagnosis.

**Figure S1.** Risk of bias (RoB) assessment of each included study.

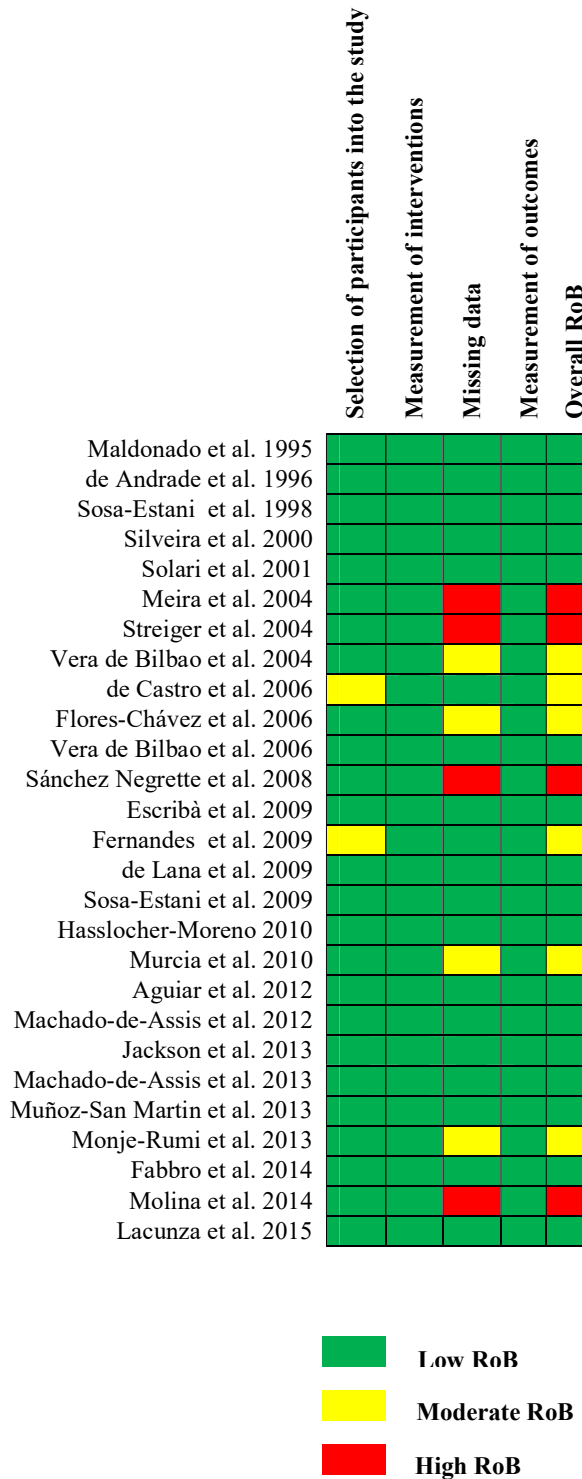

**Table S3.** Anti-trypanosomal drugs used in treated subjects with *Trypanosoma cruzi* chronic infection and duration of treatment.

| <b>Duration of treatment (days)<sup>a</sup></b> | <b>Benznidazole</b> | <b>Nifurtimox</b> | <b>Benznidazole &amp; Nifurtimox</b> | <b>Total number of subjects</b> |
|-------------------------------------------------|---------------------|-------------------|--------------------------------------|---------------------------------|
| <b>≤ 30</b>                                     | 63                  | 13                | -                                    | 76                              |
| <b>31-60</b>                                    | 848                 | 110               | 1                                    | 959                             |
| <b>&gt; 60</b>                                  | 242                 | 14                | -                                    | 256                             |
| <b>Total number of subjects</b>                 | 1153                | 137               | 1                                    | <b>1291</b>                     |

<sup>a</sup> Treatment duration not known in five subjects.

**Table S4.** Datasets reporting on conventional and non-conventional serological tests in treated subjects with chronic *Trypanosoma cruzi* infection.

| Study ID                        | Number of subjects     |                    | Total number of subjects |
|---------------------------------|------------------------|--------------------|--------------------------|
|                                 | Non-conventional tests | Conventional ELISA |                          |
| de Andrade et al. 1996          | 58 AT-ELISA            | 58                 | 116                      |
| Flores-Chávez et al. 2006       | 33 SAPA                | 33                 | 66                       |
| Sánchez Negrette et al. 2008    | 13 IRA ELISA           | 18                 | 31                       |
| Machado-de-Assis et al. 2012    | 94 TESA ELISA          | 94                 | 188                      |
| de Lana et al. 2009             |                        |                    | 48                       |
| Machado-de Assis et al. 2013    | 22 FC-ALTA             | 26                 |                          |
| Sosa-Estani et al. 1998         |                        |                    | 106                      |
| Sosa-Estani et al. 2009         | 53 ELISA F29           | 53                 |                          |
| <b>Total number of subjects</b> | <b>273</b>             | <b>282</b>         | <b>555</b>               |

AT-ELISA, antigen trypomastigote ELISA; CF-ALTA, flow cytometric analysis of anti-live trypomastigote antibodies; ELISA, enzyme-linked immunosorbent assay; ELISA F29, enzyme-linked immunosorbent assay using a *Trypanosoma cruzi* flagellar calcium-binding protein; IRA-ELISA, ELISA with individual recombinant antigens; SAPA, shed acute-phase antigen; TESA ELISA, recombinant ELISA and *Trypanosoma cruzi* excreted-secreted antigen blotting.

**Figure S2.** Kaplan-Meier plots of the progression of conventional and non-conventional serological tests in treated subjects with chronic *Trypanosoma cruzi* infection stratified by the age at treatment, with 95% IC.

1)

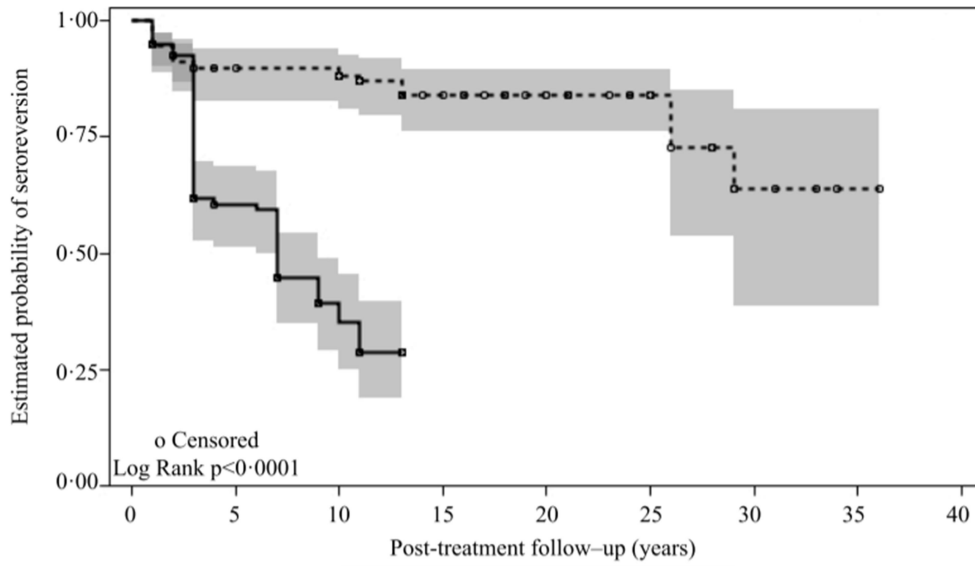

Number at risk

|            |     |     |     |    |    |    |   |   |   |
|------------|-----|-----|-----|----|----|----|---|---|---|
| 1-19 years | 157 | 50  | 19  | 0  |    |    |   |   |   |
| >19 years  | 125 | 109 | 108 | 38 | 29 | 20 | 4 | 1 | 0 |

2)

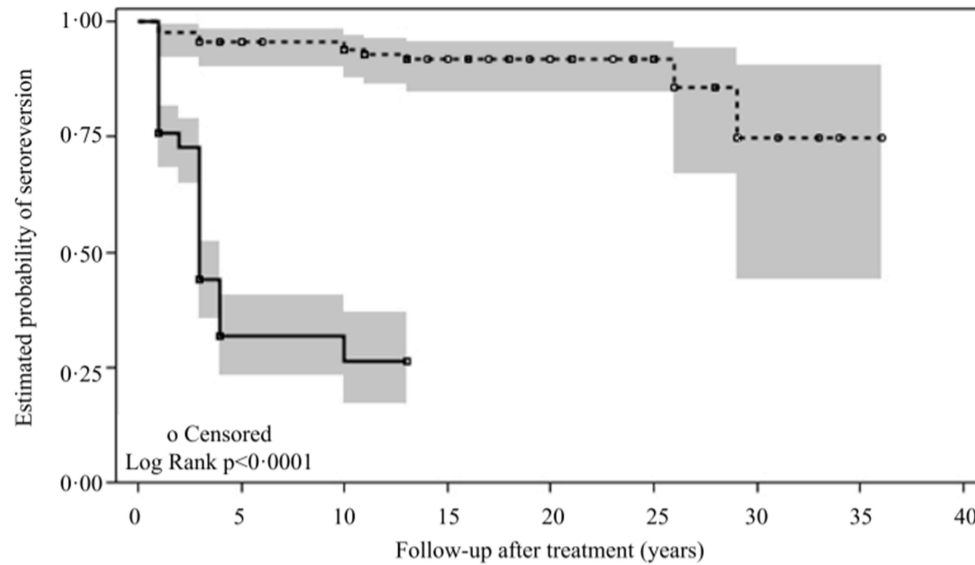

Number at risk

|            |     |     |     |    |    |    |   |   |   |
|------------|-----|-----|-----|----|----|----|---|---|---|
| 1-19 years | 156 | 12  | 12  | 0  |    |    |   |   |   |
| >19 years  | 117 | 118 | 104 | 38 | 29 | 20 | 4 | 1 | 0 |

Plots show the proportion of treated subjects progressing towards seroreversion according to (1) conventional serology and (2) non-conventional serology results during the follow-up, stratified by age at treatment (1-19 years vs. > 19 years). IC, interval confidence; ELISA, enzyme-linked immunosorbent assay.

**Table S5.** Summary of censored & uncensored values for conventional serological tests in treated subjects with chronic *Trypanosoma cruzi* infection according to categories based on PCR or xenodiagnosis results.

| Category                                         | Type of test | Number of subjects | Number of events | Number of censures | % censored |
|--------------------------------------------------|--------------|--------------------|------------------|--------------------|------------|
| <b>Potential responders</b>                      | ELISA        | 99                 | 6                | 93                 | 93.94      |
|                                                  | IIF          | 64                 | 7                | 57                 | 89.06      |
|                                                  | IHA          | 35                 | 4                | 31                 | 88.57      |
| <b>Uncertain responders</b>                      | ELISA        | 316                | 30               | 286                | 90.51      |
|                                                  | IIF          | 224                | 46               | 178                | 79.46      |
|                                                  | IHA          | 156                | 38               | 118                | 75.64      |
| <b>Non-responders / potential non-responders</b> | ELISA        | 342                | 27               | 315                | 92.11      |
|                                                  | IIF          | 239                | 44               | 195                | 81.59      |
|                                                  | IHA          | 200                | 21               | 179                | 89.50      |

‘Potential responders’, i.e. subjects with three or more negative PCR or xenodiagnosis results; ‘uncertain responders’, i.e. subjects with at least two negative PCR or xenodiagnosis results; and ‘non-responders/potential non-responders’, i.e. subjects with just one PCR or xenodiagnosis (positive or negative). ELISA, enzyme-linked immunosorbent assay; IIF, indirect immunofluorescence assay; IHA, indirect hemagglutination assay; PCR, polymerase chain reaction.

**Figure S3.** Kaplan-Meier plots of the progression of conventional serology in treated subjects with chronic *Trypanosoma cruzi* infection stratified by categories based on PCR or xenodiagnosis, with 95% IC.

1)

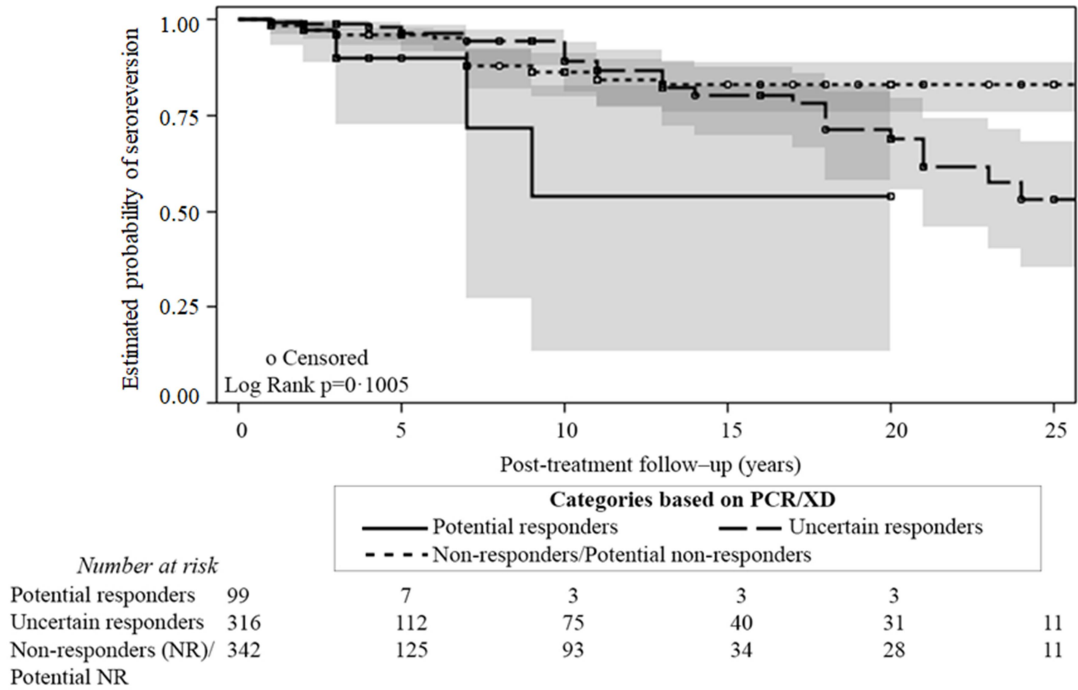

2)

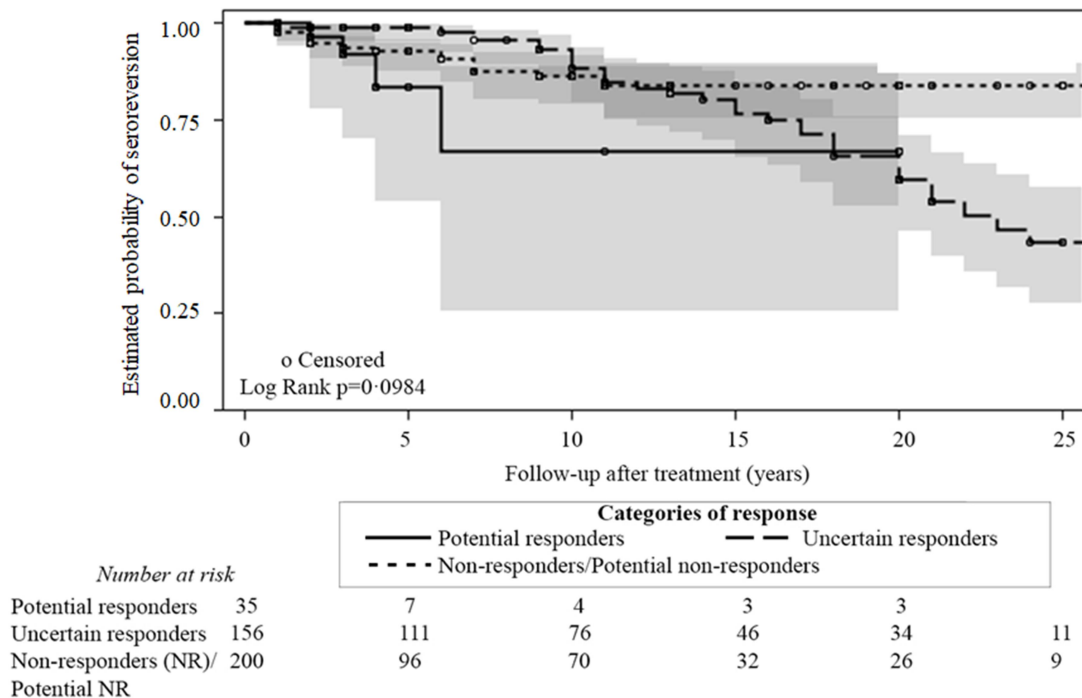



3)

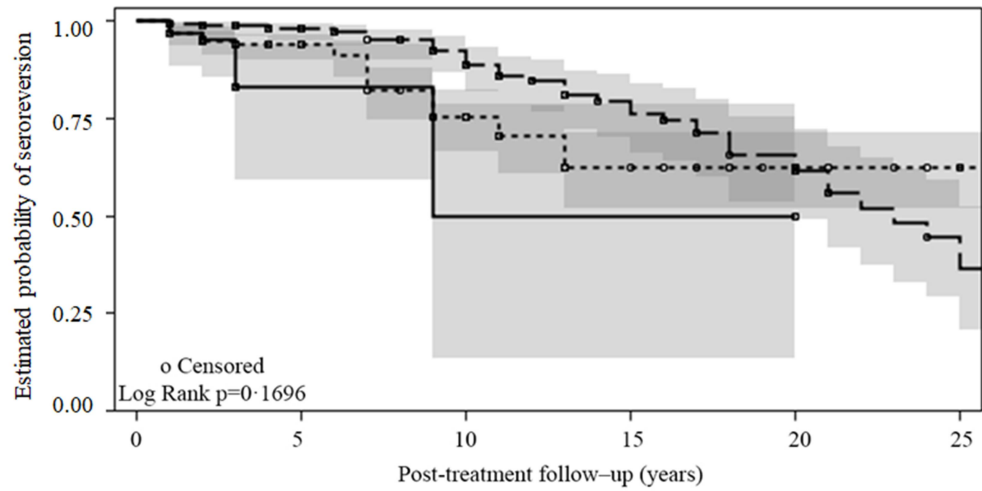

| Number at risk                    | Categories based on PCR/XD |                      |                                         |                      |                      |                                         |
|-----------------------------------|----------------------------|----------------------|-----------------------------------------|----------------------|----------------------|-----------------------------------------|
|                                   | Potential responders       | Uncertain responders | Non-responders/Potential non-responders | Potential responders | Uncertain responders | Non-responders/Potential non-responders |
| Potential responders              | 64                         | 5                    | 3                                       | 3                    | 3                    |                                         |
| Uncertain responders              | 224                        | 150                  | 100                                     | 50                   | 34                   | 11                                      |
| Non-responders (NR)/ Potential NR | 239                        | 105                  | 72                                      | 34                   | 28                   | 11                                      |

Plots show the proportion of treated subjects progressing towards seroreversion according to (1) ELISA, (2) IIF, and (3) IHA tests during the follow-up, stratified by category based on PCR or xenodiagnosis. 'Potential responders', i.e. subjects with three or more negative PCR or xenodiagnosis results; 'uncertain responders', i.e. subjects with at least two negative PCR or xenodiagnosis results; and 'non-responders/potential non-responders', i.e. subjects with just one PCR or xenodiagnosis (positive or negative). ELISA, enzyme-linked immunosorbent assay; IIF, indirect immunofluorescence assay; IHA, indirect hemagglutination assay; PCR, polymerase chain reaction.

**Table S6.** Hazard ratios (95% confidence interval) corresponding to the adjusted Cox interaction model for conventional serology in treated children or adolescents (1–19 years) versus adults (> 19 years) with chronic *Trypanosoma cruzi* infection based on studies with low risk of bias.

| Serological test | HR (95% IC)       |                                        | <i>p</i> -value <sup>a</sup> |
|------------------|-------------------|----------------------------------------|------------------------------|
|                  | Brazil            | Argentina, Bolivia, Chile and Paraguay |                              |
| <b>ELISA</b>     | 8.39 (2.45–28.78) | 1.73 (0.72–4.13)                       | 0.036                        |
| <b>IIF</b>       | 8.86 (3.20–24.53) | 1.46 (0.59–3.56)                       | 0.007                        |
| <b>IHA</b>       | 5.42 (1.48–19.90) | 1.23 (0.52–2.90)                       | 0.048                        |

IC, interval confidence; ELISA, enzyme-linked immunosorbent assay; IIF, indirect immunofluorescence assay; IHA, indirect hemagglutination assay; HR, hazard ratio.

<sup>a</sup> The *p*-value corresponds to the effect of the interaction obtained from adjusted Cox proportional hazards model.
